# Supplementary material for: Nationwide prevalence and characteristics of transthyretin amyloid cardiomyopathy in Sweden
Source: HighWire-hosted journal article supplement (doi:10.1136/openhrt-2021-001755), 2021-10-01
Supplement: openhrt-2021-001755supp001_data_supplement.pdf [file openhrt-2021-001755supp001_data_supplement.pdf]

## SUPPLEMENTARY MATERIAL

Table 1. Predictors of ATTR-CM diagnosis

| Covariates                                                               | Odds ratio | p-value | Standard error | 95% CI, lower | 95% CI, upper |
|--------------------------------------------------------------------------|------------|---------|----------------|---------------|---------------|
| Age (continuous)                                                         | 0.974      | 0.000   | 1.002          | 0.969         | 0.978         |
| Male (ref: female)                                                       | 1.927      | 0.000   | 1.073          | 1.678         | 2.214         |
| Elixhauser comorbidity index (continuous)                                | 0.993      | 0.602   | 1.014          | 0.966         | 1.020         |
| ATTR-CM related diagnoses occurring before diagnosis (ref: no diagnosis) |            |         |                |               |               |
| Carpal tunnel syndrome (uni- or bilateral)                               | 6.718      | 0.000   | 1.103          | 5.542         | 8.143         |
| Spinal stenosis                                                          | 2.702      | 0.000   | 1.139          | 2.092         | 3.489         |
| Injury of muscle and tendon of long head of biceps                       | 0.000      | 0.975   | 2.5955E+164    | 0.000         | -             |
| Injury of muscle and tendon of other parts of biceps                     | 0.000      | 0.993   | -              | 0.000         | -             |
| Primary pulmonary hypertension                                           | 1.388      | 0.649   | 2.053          | 0.339         | 5.683         |
| Other secondary pulmonary hypertension                                   | 0.686      | 0.711   | 2.762          | 0.094         | 5.026         |
| Non-rheumatic aortic (valve) stenosis                                    | 0.702      | 0.068   | 1.214          | 0.481         | 1.026         |
| Supraventricular tachycardia                                             | 1.897      | 0.024   | 1.328          | 1.087         | 3.309         |
| Sick sinus syndrome                                                      | 0.887      | 0.722   | 1.400          | 0.459         | 1.716         |
| Other specified cardiac arrhythmias                                      | 0.000      | 0.939   | 1.72664E+68    | 0.000         | 3.6036E+128   |
| Acute pericarditis                                                       | 0.541      | 0.540   | 2.726          | 0.076         | 3.863         |
| Atrioventricular and left bundle-branch block                            | 1.626      | 0.002   | 1.170          | 1.195         | 2.211         |
| Other conduction disorders                                               | 1.714      | 0.114   | 1.406          | 0.879         | 3.343         |
| Atrial fibrillation and flutter                                          | 1.214      | 0.008   | 1.076          | 1.053         | 1.400         |
| Other cardiac arrhythmias                                                | 1.279      | 0.320   | 1.281          | 0.788         | 2.079         |
| Irritable bowel syndrome                                                 | 2.455      | 0.020   | 1.472          | 1.150         | 5.240         |
| Other functional intestinal disorders                                    | 1.282      | 0.220   | 1.224          | 0.862         | 1.906         |
| Conductive and sensorineural hearing loss                                | 1.341      | 0.135   | 1.217          | 0.913         | 1.970         |

CI: Confidence Interval
